# Supplementary material for: Enhancing the thermoelectric performance of SnTe-CuSbSe2with an ultra-low lattice thermal conductivity
Source: Royal Society of Chemistry journal article supplement (doi:10.1039/d2ta09475d), 2023-01-01
Supplement: d2ta09475d1.pdf [file d2ta09475d1.pdf]

## **Enhancing the thermoelectric performance of SnTe-CuSbSe<sub>2</sub> with an ultra-low lattice thermal conductivity†**

Huihong Xu,<sup>a&</sup> Han Wan,<sup>bc&</sup> Rui Xu,<sup>d</sup> Zeqing Hu,<sup>a</sup> Xiaolong Liang,<sup>a</sup> Zhou Li<sup>\*bc</sup> and Jiming Song<sup>\*b</sup>

a. School of Chemistry and Chemical Engineering, Anhui Province Key Laboratory of Chemistry for Inorganic/Organic Hybrid Functionalized Materials, Anhui University, Hefei 230601, People's Republic of China.

b. School of Materials Science and Engineering, Key Laboratory of Structure and Functional Regulation of Hybrid Materials of Ministry of Education, Anhui University, Hefei 230601, People's Republic of China.

c. Institute of Energy, Hefei Comprehensive National Science Centre (Anhui Energy Laboratory), Hefei 230031, People's Republic of China.

d. Institutes of Physical Science and Information Technology, Anhui University, Hefei 230601, People's Republic of China.

E-mail: liz1990@ahu.edu.cn, jiming@ahu.edu.cn

& These authors contributed equally to this work.

### Calculation of the Lorenz number ( $L$ ) and effective mass ( $m^*$ )

For a degenerate semiconductor like SnTe,  $L$  and  $m^*$  can be approximatively calculated by the single parabolic band (SPB) model.<sup>1-4</sup>

The value of  $L$  is generally related to the scattering factors ( $r$ ) as well as the reduced Fermi energy ( $\eta$ ), and  $m^*$  can be obtained by a relation with Hall carrier concentration ( $n$ ). Here, acoustic phonon scattering is considered to be the prime scattering mechanism ( $r=-1/2$ ), and  $\eta$  can be deduced by (1), (2) and (3) below:

$$S(\eta) = \frac{\kappa_B}{e} \left[ \frac{\left(r + \frac{5}{2}\right) \cdot F_{r + \frac{3}{2}}(\eta)}{\left(r + \frac{3}{2}\right) \cdot F_{r + \frac{1}{2}}(\eta)} - \eta \right] \quad (1)$$

$$F_x(\eta) = \int_0^{\infty} \frac{\epsilon^x}{1 + e^{(\epsilon - \eta)}} d\epsilon \quad (2)$$

$$\eta = \frac{E_f}{k_B T} \quad (3)$$

Therefore,  $L$  and  $m^*$  can be computed as follows:

$$L = \frac{\kappa_B}{e} \left\{ \frac{\left(r + \frac{7}{2}\right) \cdot F_{r + \frac{5}{2}}(\eta)}{\left(r + \frac{3}{2}\right) \cdot F_{r + \frac{1}{2}}(\eta)} - \left[ \frac{\left(r + \frac{5}{2}\right) \cdot F_{r + \frac{3}{2}}(\eta)}{\left(r + \frac{3}{2}\right) \cdot F_{r + \frac{1}{2}}(\eta)} \right]^2 \right\} \quad (4)$$

$$n = \frac{1}{e \cdot R_H} = \frac{(2m^* \cdot \kappa_B T)^{3/2}}{3\pi^2 h^3} \cdot \frac{\left(r + \frac{3}{2}\right)^2 \cdot F_{r + \frac{1}{2}}^2(\eta)}{\left(2r + \frac{3}{2}\right) \cdot F_{2r + \frac{1}{2}}(\eta)} \quad (5)$$

Where the  $k_B$ ,  $e$ ,  $E_f$ ,  $T$ ,  $F_x(\eta)$ ,  $R_H$  and  $h$  is the Boltzmann constant, the electron charge, the Fermi energy, the absolute temperature, the Fermi integrals, the Hall coefficient and the Plank's constant, respectively.

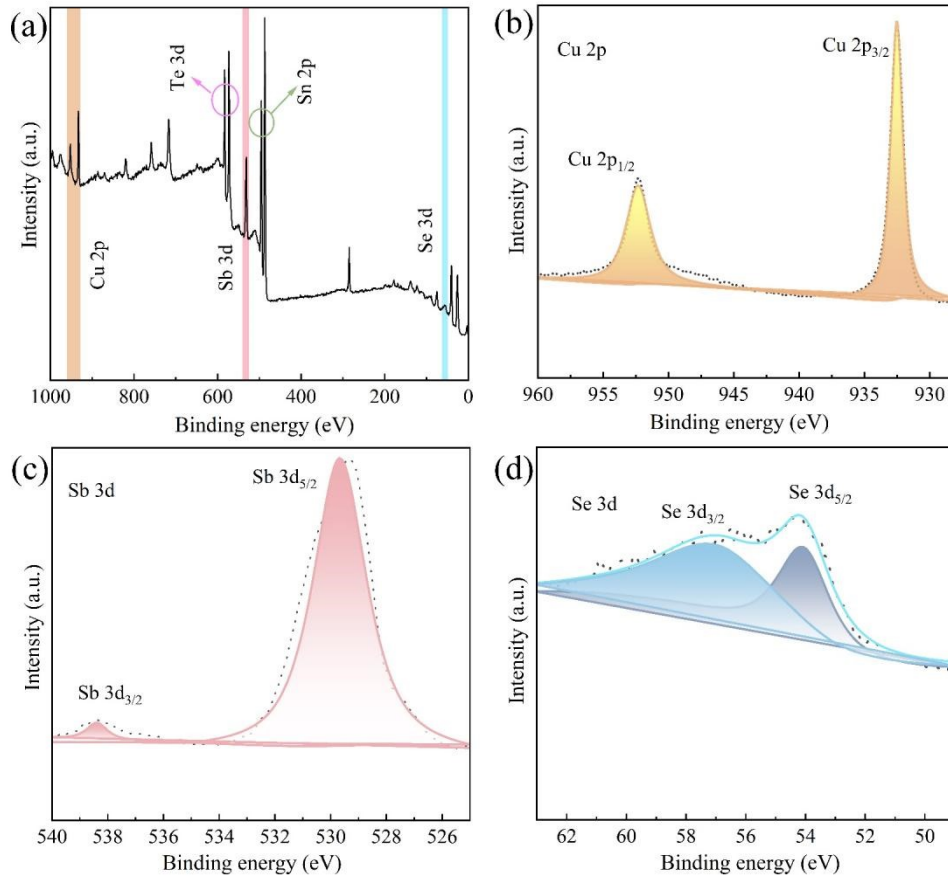

**Fig. S1** XPS spectra of the SnTe-5% CuSbSe<sub>2</sub> sample: (a) the total survey XPS spectrum; (b) high-resolution Cu 2p XPS spectrum; (c) high-resolution Sb 3d XPS spectrum; (d) high-resolution Se 3d XPS spectrum.

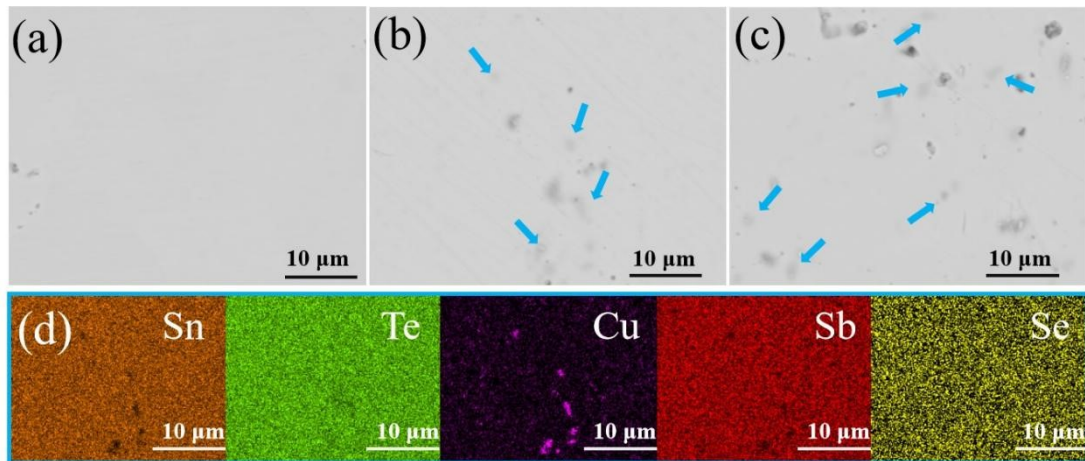

**Fig. S2** SEM micromorphology of SnTe-*x*% CuSbSe<sub>2</sub> (*x*=0, 5, 8): (a-c) BSE images of the SnTe (a), SnTe-5% CuSbSe<sub>2</sub> (b), and SnTe-8% CuSbSe<sub>2</sub> (c) samples. The blue arrows indicate the positions of Cu-based nanoprecipitates; (d-h) element mapping images of Sn, Te, Cu, Sb and Se for the SnTe-5% CuSbSe<sub>2</sub> sample.

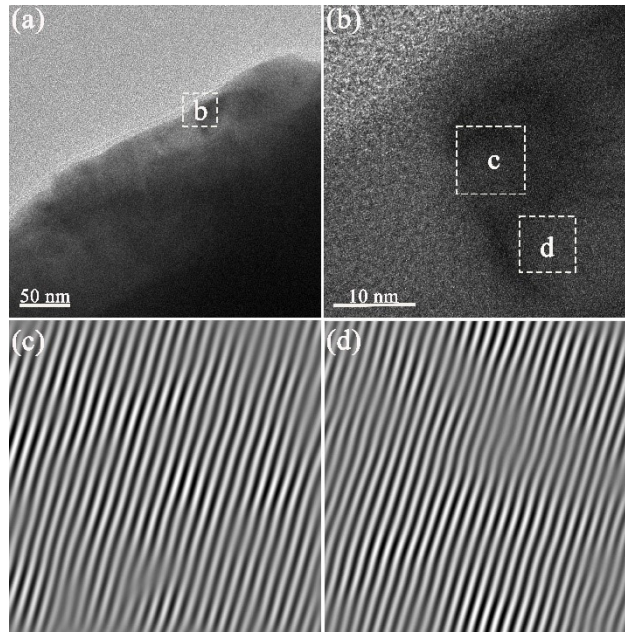

**Fig. S3** (a) Low resolution TEM images for the pristine SnTe. (b) High resolution TEM (HR-TEM) image of the marked square in (a). (c-d) IFFT of the selected region in (b).

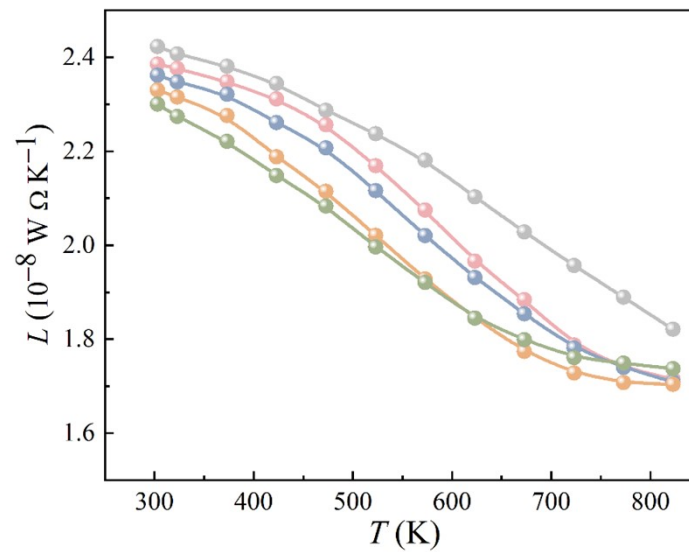

**Fig. S4** The calculated Lorenz number ( $L$ ) as a function of temperature for SnTe- $x\%$  CuSbSe<sub>2</sub> ( $x=0, 3, 5, 8, 11$ ).

## Reference

- 1 H. Zhu, Z. Li, C. X. Zhao, X. X. Li, J. L. Yang, C. Xiao and Y. Xie, *Natl. Sci. Rev.*, 2021, **8**, nwa085.
- 2 J. Shen, Z. Chen, S. Lin, L. Zheng, W. Li and Y. Z. Pei, *J. Mater. Chem. C*, 2016, **4**, 209–214.
- 3 H. J. Goldsmid, *Introduction to Thermoelectricity*, Springer, Heidelberg, 2010.
- 4 Y. L. Pei, J. Q. He, J. F. Li, F. Li, Q. J. Liu, W. Pan, C. Barreateau, D. Berardan, N. Dragoe and L. D. Zhao, *NPG Asia Mater.*, 2013, **5**, e47.
